# Supplementary material for: Subcellular Localization of Rice Acyl-CoA-Binding Proteins ACBP4 and ACBP5 Supports Their Non-redundant Roles in Lipid Metabolism
Source: PubMed Central journal article supplement (PMC7105888; doi:10.3389/fpls.2020.00331), 2020-03-24
Supplement: Data_Sheet_1.pdf [file Data_Sheet_1.pdf]

**Table S1.** Oligonucleotide primers used in this study

| Gene name                  | Primer name | Used for | Orientation | Sequence (5'-3')                                          |
|----------------------------|-------------|----------|-------------|-----------------------------------------------------------|
| <i>OsACBP4</i><br>promoter | ML2465      | PCR      | Forward     | <u>CAGTCGACCCGTCGATCCTAGTAAGTAC</u> ( <i>Sall</i> )       |
|                            | ML2823      | PCR      | Reverse     | <u>CCCAAGCTTGGCCGACGCCGACGCCGA</u> ( <i>HindIII</i> )     |
| <i>OsACBP4</i><br>CDS      | ML2824      | PCR      | Forward     | <u>CCCAAGCTTATGGGCGGCGACTGGCAG</u> ( <i>HindIII</i> )     |
| <i>GFP</i>                 | ML2825      | PCR      | Reverse     | <u>GGGTGACCTTACTTGTACAGCTCGTCCATGCC</u> ( <i>BstEII</i> ) |
| <i>OsACBP5</i><br>promoter | ML2470      | PCR      | Forward     | <u>TAGGGATCCTGACTTCCTCACGCTCTGCT</u> ( <i>BamHI</i> )     |
|                            | ML2473      | PCR      | Reverse     | <u>TAGAAGCTTGCTGCACTCCTCTCTCTCTC</u> ( <i>HindIII</i> )   |
| <i>OsACBP5</i><br>CDS      | ML2982      | PCR      | Forward     | <u>GGATCCATGGAGCTGTTCTACGAGCTG</u> ( <i>BamHI</i> )       |
|                            | ML2983      | PCR      | Reverse     | <u>TCTAGATTCAGCAGGGATGTCAGAACTC</u> ( <i>XbaI</i> )       |
| <i>DsRED</i>               | ML2984      | PCR      | Forward     | <u>TCTAGAATGGCCTCCTCCGAGAAC</u> ( <i>XbaI</i> )           |
|                            | ML2985      | PCR      | Reverse     | <u>GAGCTCTACAGGAACAGGTGGTGGC</u> ( <i>SacI</i> )          |
| <i>OsACBP4</i><br>CDS      | ML1060      | PCR      | Forward     | TGGATCCAAGGAGGACAACCTCCGAA                                |
| <i>OsACBP5</i><br>CDS      | ML1111      | PCR      | Forward     | GAGGCTATTCCAGGATGGAT                                      |
| <i>OsACBP4</i>             | ML1109      | qRT-PCR  | Forward     | GCATCTGGCTGCTGGTGTAG                                      |
|                            | ML1110      | qRT-PCR  | Reverse     | GCATTTGCATTGACAAGAATCT                                    |
| <i>OsACBP5</i>             | ML1111      | qRT-PCR  | Forward     | GAGGCTATTCCAGGATGGAT                                      |
|                            | ML1112      | qRT-PCR  | Reverse     | CTGTCATGTTGGTTGATTGTAT                                    |
| ACTIN                      | ML1115      | qRT-PCR  | Reverse     | AGGCCGTCTCTCTCTGTAT                                       |
|                            | ML1116      | qRT-PCR  | Forward     | GGGGAGAGCATATCCTTCAT                                      |

Restriction sites are underlined. CDS, coding sequence.

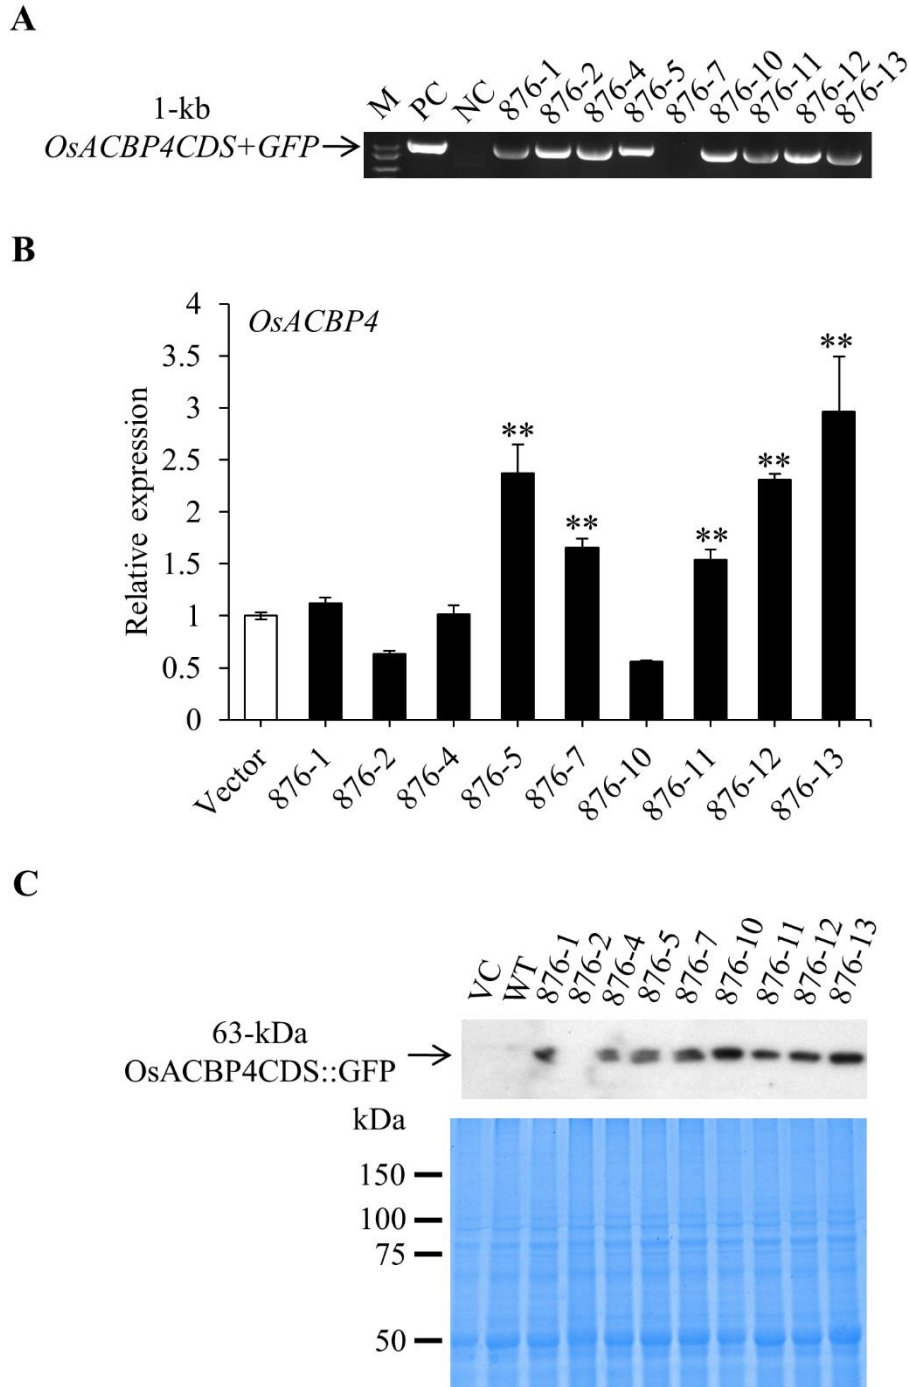

**Figure S1.** Characterization of representative transgenic rice expressing *OsACBP4::GFP* driven by the *OsACBP4* promoter. (A) PCR analysis on representative transgenic rice plants using *OsACBP4*-specific forward primer and *GFP*-specific reverse primer (ML1109 and ML2825). The PCR band of 1-kb *OsACBP4::GFP* is indicated. Putative transgenic *OsACBP4::GFP* rice plants are designated as 876 lines. CDS, coding sequence; M, 1 kb plus

marker; PC, positive control; NC, negative control. (B) Quantitative RT-PCR analysis on representative 21-day-old transgenic rice plants using *OsACBP4*-specific primers (ML1109 and ML1110) and rice *ACTIN* (*OsACTIN*)-specific primers (ML1115 and ML1116). Data are means  $\pm$  SD of three independent replicates. Asterisks indicate a significant difference between the treatments and controls (\*\*,  $P < 0.01$  by Student's *t*-test). (C) Western blot analysis to verify the expression of OsACBP4 in representative 7-day-old rice leaves using antibodies against GFP. The cross-reacting OsACBP4::GFP band (63-kDa) is indicated by an arrow. Bottom, Coomassie Blue-stained gel of total protein (20  $\mu$ g per well). VC, vector control; WT, wild type.

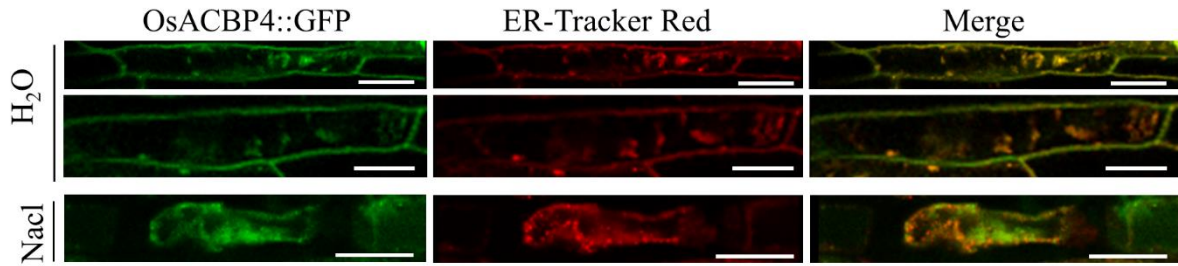

**Figure S2.** Subcellular localization of OsACBP4::GFP in transgenic rice after salt treatment. Root cells of 4-day-old transgenic rice seedlings were imaged by confocal laser scanning microscopy. Colocalization of OsACBP4::GFP (green) with ER-Tracker Red (red) (E34250, Invitrogen) in root cells of 4-day-old transgenic rice seedlings. Bars =20  $\mu$ m. Representative images were shown after observation with consistent results from at least 20 cells.

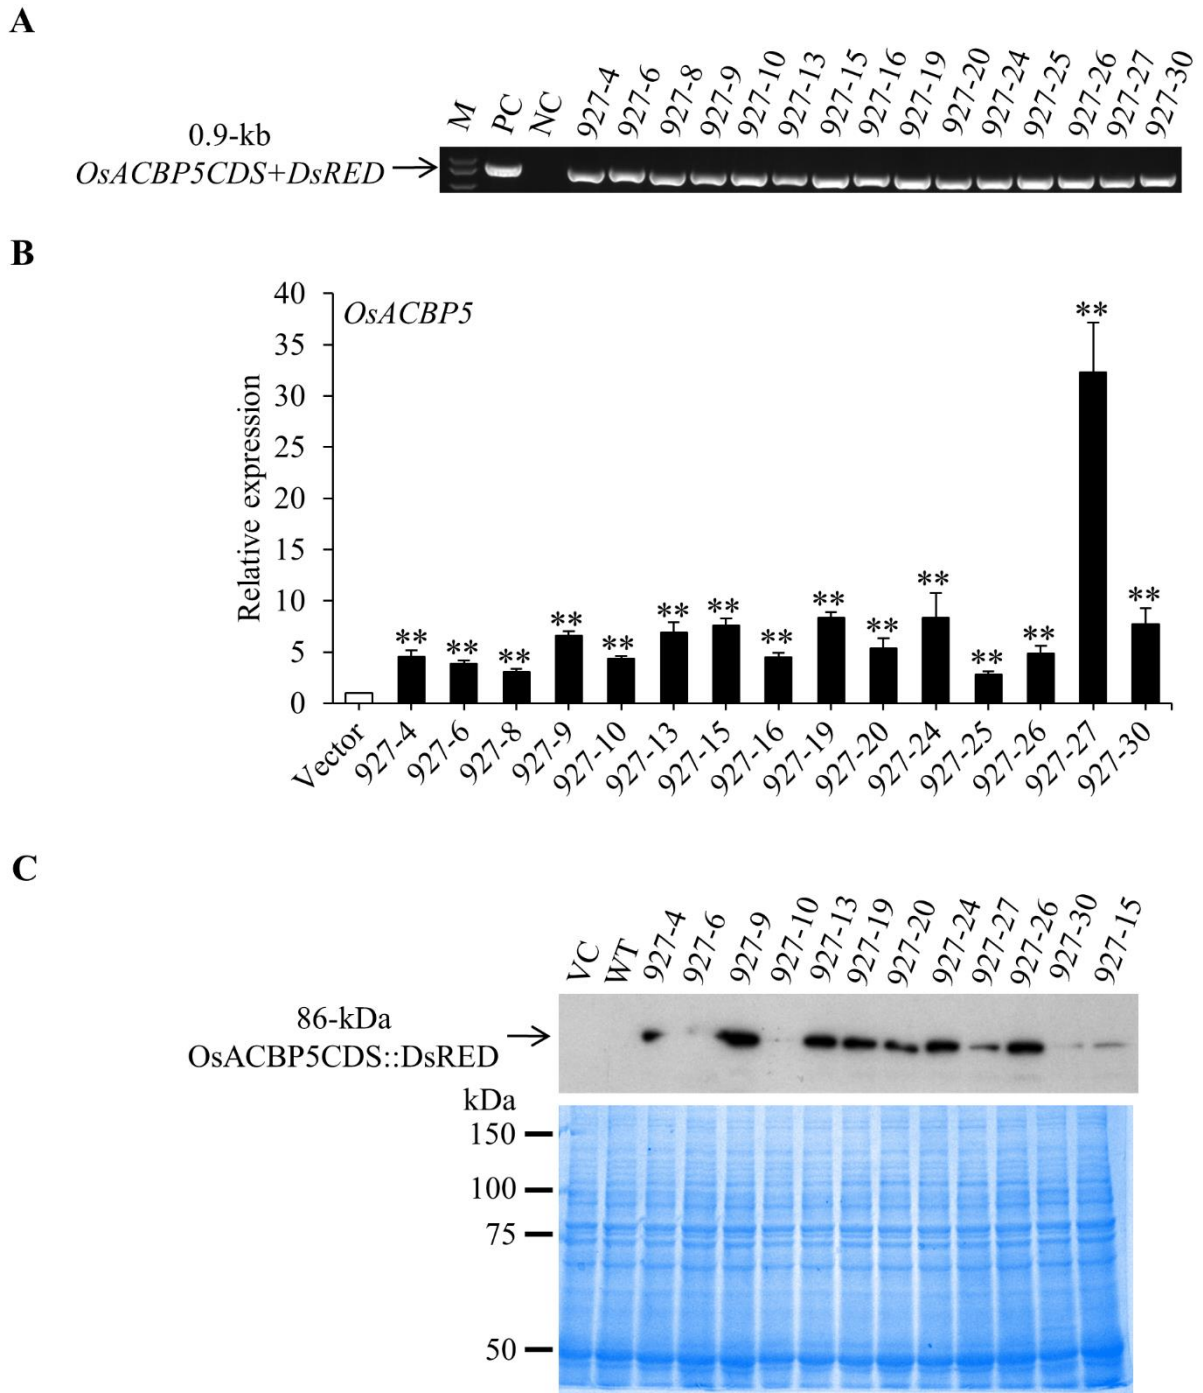

**Figure S3.** Characterization of representative transgenic rice expressing *OsACBP5::DsRED* driven by the *OsACBP5* promoter. (A) PCR analysis on representative transgenic rice plants using *OsACBP5*-specific forward primer and *DsRED*-specific reverse primer (ML1111 and ML2985). The PCR band of 0.9-kb *OsACBP5::DsRED* is indicated. Putative transgenic *OsACBP5::DsRED* rice plants are designated as 927 lines. CDS, coding sequence; M, 1 kb plus marker; PC, positive control; NC, negative control. (B) Quantitative RT-PCR analysis on

representative 21-day-old transgenic rice plants using *OsACBP5*-specific primers (ML1111 and ML1112) and rice *ACTIN* (*OsACTIN*)-specific primers (ML1115 and ML1116). Data are means  $\pm$  SD of three independent replicates. Asterisks indicate a significant difference between the treatments and controls (\*\*,  $P < 0.01$  by Student's *t*-test). (C) Western blot analysis to verify the expression of OsACBP5 in representative 7-day-old rice leaves using antibodies against RFP. The cross-reacting OsACBP5::DsRED band (86-kDa) is indicated by an arrow. Bottom, Coomassie Blue-stained gel of total protein (20  $\mu$ g per well). VC, vector control; WT, wild type.
